# Supplementary material for: Dipyridodiazepinone derivatives; synthesis and anti HIV-1 activity
Source: Beilstein J Org Chem. 2009 Jul 22;5:36. doi: 10.3762/bjoc.5.36 (PMC2748688; doi:10.3762/bjoc.5.36)
Supplement: File 1 — Experimental part. [file Beilstein_J_Org_Chem-05-36-s001.doc]

Supporting Information

Experimental part of:

Dipyridodiazepinone derivatives; synthesis and anti HIV-1 activity

Nisachon Khunnawutmanotham1, Nitirat Chimnoi1, Arunee Thitithanyanont 2, Patchreenart Saparpakorn3, Kiattawee Choowongkomon4, Pornpan Pungpo5, Supa Hannongbua3 and Supanna Techasakul *,1,3

Address: 1Chulabhorn Research Institute, Vibhavadee-Rangsit Highway, Bangkok 10210, Thailand; 2Department of Microbiology, Faculty of Science, Mahidol University, Bangkok 10400, Thailand; 3Department of Chemistry, Faculty of Science, Kasetsart University, Bangkok 10903, Thailand; 4Department of Biochemistry, Faculty of Science, Kasetsart University, Bangkok 10903, Thailand and 5Department of Chemistry, Faculty of Science, Ubonratchathani University, Ubonratchathani 34190, Thailand

Email: Supanna Techasakul* - supanna@cri.or.th

* Corresponding author

Chemical methods

The 1H (200 MHz) and 13C NMR (50 MHz) spectra were recorded on a Varian Gemini 2000 spectrometer referencing to solvent with the chemical shift recorded as  values in ppm. Coupling constants (*J*) are given in Hertz, and multiplicity is defined as follows: s = singlet, d = doublet, dd = doublet of doublet, t = triplet, q = quartet, m = multiplet, br = broad. The infrared (IR) spectra were recorded in terms of cm−1 on a Perkin Elmer 1760x FT-IR spectrometer. Mass spectra were obtained on a Finnigan Polaris GCQ mass spectrometer, while accurate masses (HRMS) were obtained using a Bruker Micro TOF in ESI positive mode. The melting points (mp) were determined on a SMP3 melting point apparatus. Column chromatography was performed on a Scharlau silica gel 60 (70-230 mesh).

**3-Amino-2,6-dichloropyridine (14).** A solution of SnCl2·2H2O (970 mg, 4.3 mmol) in concentrated HCl (0.8 mL) was added dropwise to a stirred solution of 2,6-dichloro-3-nitropyridine (250 mg, 1.3 mmol) in acetic acid (2.6 mL), and the mixture was stirred for 3 h at room temperature. This was followed by cooling in ice bath, and subsequent addition of water. After stirring for an additional 30 min, the mixture was basified with aqueous 50% sodium hydroxide (pH 12). The reaction mixture was extracted with CH2Cl2, and the combined organic layers were washed with water, dried over Na2SO4, and concentrated under reduced pressure to produce **14** (200 mg, 94.8%) as a white solid which would be used in the next step. Recrystallization from hexane/CH2Cl2 produced needles; mp 121–122 °C. FT-IR (KBr), max: 3460, 3338, 1619, 1559, 1454, 1311, 1145, 720 cm−1. 1H NMR (CDCl3) **: 7.11–7.01 (m, 2H), 4.16 (br s, 2H). 13C NMR (CDCl3) **: 138.8, 137.3, 134.6, 125.1, 123.6 ppm. MS (EI), *m/z* (relative intensity): 162 (M+, 100), 126 (20), 99 (10), 64 (30). HRMS (ESI-TOF) calcd. for C5H5Cl2N2 [M+H]+ 162.9824; found: 162.9824.

**2-(Ethylamino)-3-pyridine carboxylic acid (13).** A stirred mixture of 2-chloronicotinic acid (**12**) (300 mg, 1.9 mmol), ethylamine (1.3 mL, 19.1 mmol) was heated at 120 °C in a sealed vessel for 4 h. After cooling down and removal of the ethylamine, the residue was purified by silica gel column chromatography (30% methanol/ethyl acetate) to produce **13** (315 mg, 99.7%) as a white solid; mp 178–180 °C. FTIR (KBr), max: 3474, 3228, 1636, 1557, 1341, 1239 cm−1. 1H NMR (DMSO-*d*6) **: 8.20 (dd, *J* = 4.8, 1.8 Hz, 1H), 8.04 (dd, *J* = 7.7, 1.8 Hz, 1H), 6.50 (dd, *J* = 7.6, 5.1 Hz, 1H), 4.81 (br s, 1H), 3.43 (q, *J* = 6.9 Hz, 2H), 1.15 (t, *J* = 6.9 Hz, 3H). 13C NMR (DMSO-*d*6) **: 169.3, 158.4, 153.0, 140.1, 110.8, 106.9, 35.1, 15.0 ppm. MS (EI), *m/z* (relative intensity): 167 (M++1, 20), 151 (60), 133 (100), 122 (30), 93 (50), 78 (96). HRMS (ESI-TOF) calcd. for C8H11N2O2 [M+H]+ 167.0815; found: 167.0812.

**N-(2,6-Dichloro-3-pyridinyl)-2-ethylamino-3-pyridinecarboxamide (15a).** A stirred solution of **13** (315 mg, 1.9 mmol) in benzene (10 mL) was treated with oxalyl chloride (0.35 mL, 4.1 mmol), followed by a catalytic amount of *N*,*N*-dimethylformamide (2 drops). This mixture was stirred at room temperature for 1 h. Then the solvent was removed under reduced pressure to produce acid chloride as a yellow solid. This acid chloride was redissolved in 1,4-dioxane (10 mL) and added dropwise to a solution of **14** (200 mg, 1.2 mmol) in 1,4-dioxane (3 mL), cyclohexane (2 mL) and pyridine (0.2 mL, 2.4 mmol). After stirring at room temperature for 16 h, the resultant precipitate was filtered. The solid was redissolved in CH2Cl2 and washed with saturated aqueous NaHCO3. The organic layer was washed with water, dried over Na2SO4, and concentrated under reduced pressure. The residue was purified by silica gel column chromatography (15% EtOAc/hexane) to yield **15a** (308 mg, 80.7%) as a pale yellow solid; mp 119–120 °C. FTIR (KBr), max: 3431, 3351, 1660, 1572, 1504, 1301, 1235, 1122, 770 cm−1. 1H NMR (CDCl3) **: 8.77 (d, *J* = 7.3 Hz, 1H), 8.33 (d, *J* = 4.4 Hz, 1H), 8.20 (s, 1H), 7.97 (br s, 1H), 7.74 (d, *J* = 7.3 Hz, 1H), 7.34 (d, *J* = 8.1 Hz, 1H), 6.60 (dd, *J* = 7.3, 4.4 Hz, 1H), 3.61–3.48 (m, 2H), 1.29 (t, *J* = 7.0 Hz, 3H). 13C NMR (CDCl3) **: 166.4, 158.1, 153.4, 143.5, 138.7, 135.3, 131.2, 130.9, 123.6, 110.5, 108.0, 35.8, 14.7 ppm. MS (EI), *m/z* (relative intensity): 310 (M+, 20), 275 (25), 149 (35), 131 (100), 119 (20). HRMS (ESI-TOF) calcd. for C13H13Cl2N4O [M+H]+ 311.0461; found: 311.0464.

**N-(2,6-Dichloro-4-methyl-3-pyridinyl)-2-chloro-3-pyridinecarboxamide (17).** Using a procedure analogous to the preparation of **15a**, and starting from **12** and **16**, compound **17** was obtained in 80% as a white solid; mp 179–180 °C. FTIR (KBr), max: 3216, 1669, 1581, 1510, 1350, 1296, 1065, 856 cm−1. 1H NMR (acetone-*d*6) **: 9.65 (br s, 1H), 8.54 (dd, *J* = 4.4, 1.5 Hz, 1H), 8.13 (dd, *J* = 7.3, 1.5 Hz, 1H), 7.56 (dd, *J* = 7.7, 4.4 Hz, 1H), 7.52 (s, 1H), 2.48 (s, 3H). 13C NMR (CDCl3) **: 164.9, 153.4, 151.9, 149.3, 148.5, 148.2, 139.2, 133.3, 130.7, 126.0, 123.9, 18.8 ppm. MS (EI), *m/z* (relative intensity): 316 (M+, 10), 28 (100), 209 (6), 140 (35), 112 (22), 76 (29). HRMS (ESI-TOF) calcd. for C12H9N3OCl3 [M+H]+ 315.9806; found: 315.9813.

**N-(2,6-Dichloro-4-methyl-3-pyridinyl)-2-ethylamino-3-pyridinecarboxamide (15b).** A stirred mixture of **17** (647 mg, 2.04 mmol) and ethylamine (1.4 mL, 20.5 mmol) in 1,4-dioxane (3 mL) was heated at 100 °C in a sealed vessel for 20 min. After cooling down, water was added, and the mixture was extracted with CH2Cl2. The organic layer was washed with water, dried over Na2SO4, and concentrated under reduced pressure. The residue was purified by silica gel column chromatography (20% EtOAc/hexane) to produce **15b** (315 mg, 47%) as a white solid; mp 155–156 °C. FT-IR (KBr), max: 3394, 3214, 1625, 1582, 1499, 1332, 1255, 1109, 769 cm−1. 1H NMR (CDCl3) **: 8.32 (dd, *J* = 4.4, 1.46 Hz, 1H), 7.97 (br s, 1H), 7.87 (dd, *J* = 7.3, 1.46 Hz, 1H), 7.60 (br s, 1H), 7.24 (s, 1H), 6.57 (dd, *J* = 7.7, 4.4 Hz, 1H), 3.58–3.45 (m, 2H), 2.34 (s, 3H), 1.26 (t, *J* = 7.0 Hz, 3H). 13C NMR (CDCl3) **: 166.8, 158.1, 153.0, 150.8, 147.7, 147.0, 136.3, 129.3, 125.1, 110.4, 107.9, 36.0, 19.0, 14.7 ppm. MS (EI), *m/z* (relative intensity): 324 (M+, 11), 289 (28), 149 (48), 131 (100), 119 (14). HRMS (ESI-TOF) calcd. for C14H15N4OCl2 [M+H]+ 325.0617; found: 325.0619

**N-(2,6-Dichloro-3-pyridinyl)-5-bromo-2-ethylamino-3-pyridinecarboxamide (18a)*.*** A solution of Br2 (0.06 mL, 1.17 mmol) in acetic acid (1 mL) was added dropwise to a stirred solution of **15a** (355 mg, 1.14 mmol), and potassium acetate (134 mg, 1.36 mmol) in acetic acid (15 mL). After 15 min, the reaction mixture was added with water, and the precipitate was collected through suction filtration. It was then washed with water for several times to produce **18a** (435 mg, 98.0%) as a yellow solid; mp 193–194 °C. FT-IR (KBr), max: 3439, 3336, 1673, 1575, 1506, 1302, 1248, 787, 528 cm−1. 1H NMR (CDCl3) **: 8.69 (d, *J* = 8.8 Hz, 1H), 8.33 (d, *J* = 2.2 Hz, 1H), 8.10 (br s, 1H), 7.89 (br s, 1H), 7.79 (d, *J* = 2.2 Hz, 1H), 7.30 (d, *J* = 8.1 Hz, 1H), 3.58–3.44 (m, 2H), 1.27 (t, *J* = 7.3 Hz, 3H). 13C NMR (CDCl3) **: 165.4, 156.5, 154.2, 139.1, 137.4, 131.7, 130.7, 123.8, 109.6, 103.9, 36.1, 14.6 ppm. MS (EI), *m/z* (relative intensity): 388 (M+, 60), 373 (15), 353 (20), 227 (70), 209 (60). HRMS (ESI-TOF) calcd. for C13H12BrCl2N4O [M+H]+ 388.9566; found: 388.9579.

**N-(2,6-Dichloro-4-methyl-3-pyridinyl)-5-bromo-2-ethylamino-3-pyridinecarboxamide (18b).** Using a procedure analogous to the preparation of **18a**, and starting from **15b**, **18b** was obtained in 97.5% as a yellow solid; mp 186–187 °C. FT-IR (KBr), max: 3417, 3259, 1635, 1583, 1497, 1350, 1246, 788, 521 cm−1. 1H NMR (CDCl3) **: 8.32 (d, *J* = 2.2 Hz, 1H), 7.93 (d, *J* = 2.2 Hz, 1H and br s, 1H), 7.53 (br s, 1H), 7.25 (s, 1H), 3.55–3.41 (m, 2H), 2.33 (s, 3H), 1.24 (t, *J* = 7.3 Hz, 3H). 13C NMR (CDCl3) **: 165.7, 156.1, 152.8, 150.8, 148.0, 147.1, 138.6, 128.8, 125.2, 109.4, 103.6, 36.3, 19.0, 14.5 ppm. MS (EI), *m/z* (relative intensity): 402 (M+, 20), 367 (27), 323 (8), 227 (77), 209 (80). HRMS (ESI-TOF) calcd. for C14H14N4OCl2Br [M+H]+ 402.9723; found: 402.9730.

**8-Bromo-2-chloro-5,11-dihydro-11-ethyl-6*H*-dipyrido[3,2-*b*:2’,3’-*e*][1,4]diazepin-6-one (19a).** A solution of **18a** (440 mg, 1.13 mmol) in pyridine (10 mL) was heated at 90°C under nitrogen atmosphere. Then the solution was added sodium bis(trimethylsilyl)amide (0.6 M in toluene, 6.3 mL, 3.7 mmol), and the mixture was stirred at 90°C for 15 min. After cooling down, the mixture was poured into ice water and stirred for 2 h. The precipitate was filtered and washed with water to produce **19a** (370 mg, 92.8%) as a yellow solid; mp 263–264 °C. FT-IR (KBr), max: 3195, 3074, 2972, 1665, 1575, 1456, 1381, 1226, 687, 630 cm−1. 1H NMR (CDCl3) **: 8.53 (br s, 1H), 8.49 (d, *J* = 2.2 Hz, 1H), 8.24 (d, *J* = 2.2 Hz, 1H), 7.27 (d, *J* = 8.1 Hz, 1H), 7.06 (d, J = 8.1 Hz, 1H), 4.81 (q, *J* = 7.3 Hz, 2H), 1.25 (t, *J* = 7.3 Hz, 3H). 13C NMR (DMSO-*d*6) **: 165.4, 156.8, 151.8, 150.5, 143.0, 142.6, 133.3, 126.3, 122.2, 120.4, 113.6, 41.5, 13.4 ppm. MS (EI), *m/z* (relative intensity): 352 (M+, 80), 337 (42), 324 (75), 309 (20). HRMS (ESI-TOF) calcd. for C13H11BrClN4O [M+H]+ 352.9799; found: 352.9803.

**8-Bromo-2-chloro-5,11-dihydro-11-ethyl-4-methyl-6*H*-dipyrido[3,2-*b*:2’,3’-*e*][1,4]diazepin-6-one (19b).**Using a procedure analogous to the preparation of **19a**, and starting from **18b**, after purification with silica gel column chromatography (20% EtOAc/hexane), **19b** was obtained in 85% as a yellow solid; mp 222–223 °C. FT-IR (KBr), max: 3181, 3065, 2965, 1664, 1578, 1440, 1376, 1229, 675, 640 cm−1. 1H NMR (CDCl3) **: 8.74 (br s, 1H), 8.47 (d, *J* = 2.9 Hz, 1H), 8.18 (d, *J* = 2.9 Hz, 1H), 6.97 (s, 1H), 4.14 (q, *J* = 7.3 Hz, 2H), 2.39 (s, 3H), 1.23 (t, *J* = 7.3 Hz, 3H). 13C NMR (CDCl3) **: 167.5, 158.0, 152.5, 152.3, 145.3, 142.5(2C), 123.8, 121.6(2C), 114.0, 42.1, 17.8, 13.6 ppm. MS (EI), *m/z* (relative intensity): 366 (M+, 64), 351 (45), 338 (70), 324 (25). HRMS (ESI-TOF) calcd. for C14H13N4OClBr [M+H]+ 366.9956; found: 366.9960.

**2-Chloro-5,11-dihydro-11-ethyl-8-vinyl-6*H*-dipyrido[3,2-*b*:2’,3’-*e*][1,4]diazepin-6-one (20a).** A solution of **19a** (500 mg, 1.4 mmol) in *N*,*N*-dimethylformamide (7 mL) was treated with tetrakis(triphenylphosphine)­palladium(0) (70 mg, 0.06 mmol) followed by vinyl tributyltin (1 mL, 3.42 mmol), and heated at 100 °C under N2 atmosphere for 0.5 h. After cooling down, the reaction mixture was poured into water and extracted with ethyl acetate. The combined organic layers were washed with 15% aqueous ammonia, brine, and water, and then dried over Na2SO4 and concentrated under reduced pressure. The residue was purified by silica gel column chromatography (30% EtOAc/hexane) to produce **20a** (318 mg, 74.6%) as a yellow solid; mp 201–202 °C. FT-IR (KBr), max: 3195, 2965, 1665, 1585, 1455, 1383, 1239, 688 cm−1. 1H NMR (CDCl3) **: 9.37 (s, 1H), 8.46 (d, *J* = 2.2 Hz, 1H), 8.20 (d, *J* = 2.2 Hz, 1H), 7.35 (d, *J* = 8.1 Hz, 1H), 7.04 (d, *J* = 8.1 Hz, 1H), 6.66 (dd, *J* = 17.6, 11.0 Hz, 1H), 5.78 (d, *J* = 17.6 Hz, 1H), 5.35 (d, *J* = 11.0 Hz, 1H), 4.22 (q, *J* = 7.3 Hz, 2H), 1.27 (t, *J* = 7.3 Hz, 3H). 13C NMR (CDCl3) **: 168.8, 157.9, 151.9, 150.1, 145.1, 137.7, 131.9, 131.8, 128.8, 125.0, 119.7, 119.6, 115.8, 42.1, 13.7 ppm. MS (EI), *m/z* (relative intensity): 300 (M+, 100), 285 (35), 272 (92), 257 (35). HRMS (ESI-TOF) calcd. for C15H14ClN4O [M+H]+ 301.0851; found: 301.0855.

**2-Chloro-5,11-dihydro-11-ethyl-4-methyl-8-vinyl-6*H*-dipyrido[3,2-*b*:2’,3’-*e*][1,4]diazepin-6-one (20b).** Using a procedure analogous to the preparation of **20a**, and starting from **19b**, **20b** was obtained in 80% as a pale brown solid; mp 185–186 °C (dec.). FT-IR (KBr), max: 3189, 2968, 1656, 1594, 1459, 1376, 1232 cm−1. 1H NMR (CDCl3) **: 8.43 (d, *J* = 2.2 Hz, 1H), 8.41 (s, 1H), 8.16 (d, *J* = 2.2 Hz, 1H), 6.94 (s, 1H), 6.65 (dd, *J* = 17.6, 11 Hz, 1H), 5.76 (d, *J* = 17.6 Hz, 1H), 5.33 (d, *J* = 11 Hz, 1H), 4.18 (q, *J* = 7.3 Hz, 2H), 2.38 (s, 3H), 1.24 (t, *J* = 7.3 Hz, 3H). 13C NMR (CDCl3) **: 168.8, 158.5, 152.6, 149.9, 145.0, 142.3, 137.2, 131.9, 128.7, 123.8, 121.2, 120.0, 115.6, 42.0, 17.8, 13.6 ppm. MS (EI), *m/z* (relative intensity): 314 (M+, 100), 299 (43), 286 (80), 271 (34), 257 (11). HRMS (ESI-TOF) calcd. for C16H16N4OCl [M+H]+ 315.1007; found: 315.1009.

**2-Chloro-5,11-dihydro-11-ethyl-8-formyl-6*H*-dipyrido[3,2-*b*:2’,3’-*e*][1,4]diazepin-6-one (21a).** A –78 °C cooled solution of **20a** (343 mg, 1.14 mmol) in 1:1 dichloromethane-methanol (20 mL) was treated with O3 for 30 min. After the completion of the reaction, the solution was purged with O2 for 5 min. Then the reaction mixture was stirred with triphenylphosphine (598 mg, 2.28 mmol) for an additional 1 h at room temperature. The solvent was removed under reduced pressure, and the residue was purified by silica gel column chromatography (30% EtOAc/hexane) to yield **21a** (295 mg, 85.4%) as a yellow solid; mp 216–217 °C. FT-IR (KBr), nmax: 3203, 2939, 1702, 1674, 1596, 1456, 1354, 1231, 975, 692. 1H NMR (CDCl3) **: 10.02 (s, 1H), 9.53 (s, 1H), 8.60 (d, *J* = 2.2 Hz, 1H), 8.64 (d, *J* = 2.2 Hz, 1H), 7.41 (d, *J* = 8.1 Hz, 1H), 7.13 (d, J = 8.1 Hz, 1H), 4.34 (q, *J* = 7.0 Hz, 2H), 1.32 (t, *J* = 7.0 Hz, 3H). 13C NMR (CDCl3) **: 188.6, 168.1, 162.1, 153.8, 149.9, 145.3, 142.3, 132.3, 126.9, 125.0, 120.8, 118.8, 43.0, 13.7 ppm. MS (EI), *m/z* (relative intensity): 302 (M+, 80), 287 (30), 274 (100), 260 (30), 245 (35). HRMS (ESI-TOF) calcd. for C14H12ClN4O2 [M+H]+ 303.0643; found: 303.0645.

**2-Chloro-5,11-dihydro-11-ethyl-8-formyl-4-methyl-6*H*-dipyrido[3,2-*b*:2’,3’-*e*][1,4]diazepin-6-one (21b).** Using a procedure analogous to the preparation of **21a**, and starting from **20b**, compound **21b** was obtained in 81% as a yellow solid; mp 207–208 °C. FT-IR (KBr), max: 3181, 2964, 1697, 1693, 1591, 1459, 1355, 1228 , 903, 807 cm−1. 1H NMR (CDCl3) **: 10.01 (s, 1H), 8.89 (d, *J* = 2.2 Hz, 1H), 8.83 (s, 1H), 8.57 (d, *J* = 2.2 Hz, 1H), 7.02 (s, 1H), 4.30 (q, *J* = 7.3 Hz, 2H), 2.43 (s, 3H), 1.29 (t, *J* = 7.3 Hz, 3H). 13C NMR (CDCl3) **: 188.6, 167.7, 162.6, 153.7, 150.9, 145.3, 142.9, 142.0, 127.0, 123.9, 122.2, 119.5, 42.9, 17.9, 13.7 ppm. MS (EI), *m/z* (relative intensity): 316 (M+, 100), 301 (40), 288 (83), 273 (22), 259 (14). HRMS (ESI-TOF) calcd. for C15H14N4O2Cl [M+H]+ 317.0800; found: 317.0806.

**2-Chloro-5,11-dihydro-11-ethyl-8-hydroxymethyl-6*H*-dipyrido[3,2-*b*:2’,3’-*e*][1,4]diazepin-6-one (22a).** A solution of **21a** (228 mg, 0.75 mmol) in tetrahydrofuran (12 mL) was added with water (0.1 mL) and sodium borohydride (28.5 mg, 0.75 mmol). The mixture was stirred for 0.5 h, then diluted with additional water. Tetrahydrofuran was removed under reduced pressure, and the precipitate was filtered and washed with water to yield **22a** (214 mg, 93%) as a white solid; mp 197–198 °C. FT-IR (KBr), nmax: 3319, 3191, 2959, 1666, 1590, 1456, 1390, 1232, 1041 cm−1. 1H NMR (acetone-*d*6) **: 9.50 (br s, 1H), 8.46 (d, *J* = 2.2 Hz, 1H), 8.11 (d, *J* = 2.2 Hz, 1H), 7.60 (d, *J* = 8.1 Hz, 1H), 7.18 (d, *J* = 8.1 Hz, 1H), 4.65 (d, *J* = 5.13 Hz, 2H), 4.56 (t, *J* = 5.86 Hz, 1H), 4.15 (q, *J* = 7.3 Hz, 2H), 1.21 (t, *J* = 7.3 Hz, 3H). 13C NMR (acetone-*d*6) **: 167.8, 158.7, 152.7, 151.0, 144.5, 140.3, 134.1, 133.4, 127.3, 121.2, 120.5, 61.5, 42.4, 14.0 ppm. MS (EI), *m/z* (relative intensity): 304 (M+, 69), 289 (39), 276 (100), 261 (29), 247 (20), 164 (31). HRMS (ESI-TOF) calcd. for C14H14ClN4O2 [M+H]+ 305.0800; found: 305.0805.

**2-Chloro-5,11-dihydro-11-ethyl-8-hydroxymethyl-4-methyl-6*H*-dipyrido[3,2-*b*:2’,3’-*e*][1,4]diazepin-6-one (22b).**Using a procedure analogous to the preparation of **22a**, and starting from **21b**, compound **22b** was obtained in 99% as a white solid; mp 259–260 °C. FT-IR (KBr), max: 3352, 3191, 1651, 1594, 1477, 1386, 1228, 1044 cm−1. 1H NMR (DMSO-*d*6) **: 10.01 (s, 1H), 8.39 (d, *J* = 2.2 Hz, 1H), 7.97 (d, *J* = 2.2 Hz, 1H), 7.19 (s, 1H), 5.33 (t, *J* = 5.86 Hz, 1H), 4.48 (d, *J* = 5.86 Hz, 2H), 3.99 (q, *J* = 7.3 Hz, 2H), 2.33 (s, 1H), 1.14 (t, *J* = 7.3 Hz, 3H). 13C NMR (DMSO-*d*6) **: 166.9, 157.4, 153.0, 149.4, 144.7, 143.0, 138.7, 133.3, 124.6, 121.2, 120.7, 59.7, 41.0, 17.5, 14.0 ppm. MS (EI), *m/z* (relative intensity): 318 (M+, 100), 303 (45), 290 (88), 275 (20), 261 (9). HRMS (ESI-TOF) calcd. for C15H16N4O2Cl [M+H]+ 319.0956; found: 319.0955.

**2-Chloro-5,11-dihydro-11-ethyl-8-chloromethyl-6*H*-dipyrido[3,2-*b*:2’,3’-*e*][1,4]diazepin-6-one (23a).** A suspension of **22a** (177 mg, 0.58 mmol) in dichloromethane (100 mL) was treated with thionyl chloride (0.3 mL) followed by triethylamine (1 mL). The reaction mixture was stirred at room temperature for 1 h, and a clear solution was eventually obtained. Afterwards, the saturated aqueous NaHCO3 was added, and the mixture was extracted with CH2Cl2. The organic layer was washed with water, dried over Na2SO4, and concentrated under reduced pressure. The residue was purified by silica gel column chromatography (20% EtOAc/hexane) to yield **23a** (163 mg, 87%) as a pale yellow solid; mp 226–227°C. FT-IR (KBr), nmax: 3195, 2969, 1671, 1588, 1455, 1382, 1247, 699 cm−1. 1H NMR (CDCl3) **: 9.15 (br s, 1H), 8.47 (d, *J* = 2.9 Hz, 1H), 8.19 (d, *J* = 2.9 Hz, 1H), 7.34 (d, *J* = 8.1 Hz, 1H), 7.06 (d, *J* = 8.1 Hz, 1H), 4.58 (s, 2H), 4.23 (q, *J* = 7.3 Hz, 2H), 1.27 (t, *J* = 7.3 Hz, 3H). 13C NMR (CDCl3) **: 168.3, 158.7, 151.7, 151.5, 145.2, 141.4, 131.9, 128.3, 125.0, 119.9, 119.6, 42.3, 42.2, 13.7 ppm. MS (EI), *m/z* (relative intensity): 322 (M+, 54), 307 (31), 294 (62), 287 (37), 259 (100), 244 (28), 231 (21). HRMS (ESI-TOF) calcd. for C14H13Cl2N4O [M+H]+ 323.0461; found: 323.0470.

**2-Chloro-5,11-dihydro-11-ethyl-8-chloromethyl-4-methyl-6*H*-dipyrido[3,2-*b*:2’,3’-*e*][1,4]diazepin-6-one (23b).** Using a procedure analogous to the preparation of **23a**, and starting from **22b**, compound **23b** was obtained in 74% as a white solid; mp 229–230 °C. FT-IR (KBr), max: 3180, 2970, 1651, 1603, 1465, 1382, 1284, 707 cm−1. 1H NMR (CDCl3) **: 8.57 (br s, 1H), 8.45 (d, *J* = 2.2 Hz, 1H), 8.14 (d, *J* = 2.2 Hz, 1H), 6.96 (s, 1H), 4.56 (s, 2H), 4.19 (q, *J* = 7.3 Hz, 2H), 2.39 (s, 3H), 1.24 (t, *J* = 7.3 Hz, 3H). 13C NMR (CDCl3) **: 168.2, 159.2, 152.4, 151.6, 145.2, 142.4, 141.0, 128.4, 123.9, 121.5, 120.1, 42.3, 42.1, 17.8, 13.7 ppm. MS (EI), *m/z* (relative intensity): 336 (M+, 79), 321 (56), 308 (75), 301 (38), 293 (19), 273 (100), 258 (15), 245 (18). HRMS (ESI-TOF) calcd. for C15H15N4OCl2 [M+H]+ 337.0617; found: 337.0624.

**2-Chloro-5,11-dihydro-11-ethyl-8-[(phenylthio)-methyl]-6*H*-dipyrido[3,2-*b*:2’,3’-*e*][1,4]diazepin-6-one (2).**A solution of thiophenol (0.1 mL, 0.97 mmol) in *N*,*N*-dimethylformamide (2 mL) was treated with sodium hydride (60% suspension in oil, 65 mg, 1.6 mmol) under N2 atmosphere. After 10 min, a solution of **23a** (100 mg, 0.31 mmol) in *N*,*N*-dimethylformamide (3 mL) was added, and the mixture was stirred at room temperature for 1 h. The reaction was quenched by adding water, and the mixture was extracted with ethyl acetate. The organic layer was washed with water, dried over Na2SO4, and concentrated under reduced pressure. The residue was purified by silica gel column chromatography (20% EtOAc/hexane) to give **2** (85.5 mg, 70%) as a yellow solid; mp 188.5–189.5 °C. FT-IR (KBr), nmax: 3182, 2965, 1665, 1585, 1455, 1383, 1239, 739, 688 cm−1. 1H NMR (CDCl3) **: 9.33 (s, 1H), 8.29 (d, *J* = 2.2 Hz, 1H), 8.09 (d, *J* = 2.2 Hz, 1H), 7.34–7.20 (m, 6H), 7.04 (d, *J* = 8.1 Hz, 1H), 4.18 (q, *J* = 7.3 Hz, 2H), 4.05 (s, 2H), 1.23 (t, *J* = 7.3 Hz, 3H). 13C NMR (CDCl3) **: 168.6, 157.8, 151.8, 145.1, 141.2, 134.9, 131.8, 130.6(2C), 129.1(2C), 128.6, 127.0(2C), 125.1, 119.7, 119.6, 42.0, 35.6, 13.6 ppm. MS (EI), *m/z* (relative intensity): 396 (M+, 7), 287 (100), 259 (52), 231 (14). HRMS (ESI-TOF) calcd. for C20H18ClN4OS [M+H]+ 397.0884; found: 397.0894.

**2-Chloro-5,11-dihydro-11-ethyl-8-{[(3-methoxyphenyl)thio]methyl}-6*H*-dipyrido[3,2-*b*:2’,3’-*e*][1,4]diazepin-6-one (3).** Using a procedure analogous to the preparation of **2**, and starting from **23a** and 3-methoxythiophenol, **3** was obtained in 87% as yellow crystals; mp 188–189 °C. FT-IR (KBr), nmax: 3181, 2965, 1662, 1589, 1458, 1385, 1229, 1044, 767, 693 cm−1. 1H NMR (CDCl3) **: 9.56 (br s, 1H), 8.30 (d, *J* = 2.2 Hz, 1H), 8.08 (d, *J* = 2.2 Hz, 1H), 7.33 (d, *J* = 8.1 Hz, 1H), 7.18 (t, *J* = 8.1 Hz, 1H), 7.04 (d, *J* = 8.1 Hz, 1H), 6.90–6.72 (m, 3H), 4.06 (s, 2H), 3.73 (s, 3H), 1.23 (t, *J* = 7.3 Hz, 3H). 13C NMR (CDCl3) **: 168.8, 159.9, 157.9, 151.8(2C), 145.1, 141.2, 136.2, 131.8, 129.9, 128.6, 125.2, 122.6, 119.7, 119.6, 115.8, 112.9, 55.3, 42.1, 35.4, 13.6 ppm. MS (EI), *m/z* (relative intensity): 426 (M+, 6), 287 (100), 259 (57), 231 (15). HRMS (ESI-TOF) calcd. for C21H20ClN4O2S [M+H]+ 427.0990; found: 427.0988.

**2-Chloro-5,11-dihydro-11-ethyl-8-{[(3-fluorophenyl)thio]methyl}-6*H*-dipyrido[3,2-*b*:2’,3’-*e*][1,4]diazepin-6-one (4).** Using a procedure analogous to the preparation of **2**, and starting from **23a** and 3-fluorothiophenol, **4** was obtained in 78% as yellow crystals; mp 179–180°C. FT-IR (KBr), max: 3189, 2935, 1663, 1579, 1454, 1384, 1250, 1145, 776 cm−1. 1H NMR (CDCl3) **: 9.14 (s, 1H), 8.34 (s, 1H), 8.11 (s, 1H), 7.33 (d, *J* = 7.8 Hz, 1H), 7.26–7.20 (m, 1H), 7.07–7.00 (m, 3H), 6.89 (dt, J = 8.3, 2.2 Hz, 1H), 4.20 (q, *J* = 6.9 Hz, 2H), 4.08 (s, 2H), 1.24 (t, *J* = 6.8 Hz, 3H). 13C NMR (CDCl3) **: 168.5, 164 (d, 1*J*F,C = 220), 157.9, 151.6(2C), 145.1, 141.4, 137.2, 131.9, 130.4 (d, 3JF,CH = 8.5), 127.9, 125.3, 125.0, 119.8, 119.7, 116.5 (d, 2*J*F,CH = 23.1), 113.8 (d, 2*J*F,CH = 21), 42.1, 35.0, 13.6 ppm. MS (EI), *m/z* (relative intensity): 414 (M+, 10), 287 (100), 259 (47), 231 (16). HRMS (APCI-TOF) calcd. for C20H17N4OSClF [M+H]+ 415.0790; found: 415.0787.

**2-Chloro-5,11-dihydro-11-ethyl-4-methyl-8-[{(phenyl)thio]methyl}-6*H*-dipyrido[3,2-*b*:2’,3’-*e*][1,4]diazepin-6-one (5).** Using a procedure analogous to the preparation of **2**, and starting from **23b** and thiophenol, **5** was obtained in 62% as white crystals; mp 166–167 °C. FT-IR (KBr), max: 3174, 2965, 1651, 1593, 1461, 1378, 1231, 737, 689 cm−1. 1H NMR (CDCl3) **: 8.60 (br s, 1H), 8.27 (d, *J* = 2.2 Hz, 1H), 8.05 (d, *J* = 2.2 Hz, 1H), 7.31–7.19 (m, 5H), 6.93 (s, 1H), 4.14 (q, *J* = 7.3 Hz, 2H), 4.05 (s, 2H), 2.37 (s, 3H), 1.21 (t, *J* = 7.3 Hz, 3H). 13C NMR (CDCl3) **: 168.5, 158.3, 152.6, 151.6, 145.0, 142.3, 140.9, 135.0, 130.5(2C), 129.1(2C), 128.6, 127.0, 124.0, 121.3, 120.1, 42.0, 35.6, 17.8, 13.6 ppm. MS (EI), *m/z* (relative intensity): 410 (M+, 10), 301 (100), 273 (30), 245 (6). HRMS (ESI-TOF) calcd. for C21H20N4OSCl [M+H]+ 411.1041; found: 411.1039.

**2-Chloro-5,11-dihydro-11-ethyl-4-methyl-8-[{(3-methoxyphenyl)thio]­methyl}-6*H*-dipyrido[3,2-*b*:2’,3’-*e*][1,4]diazepin-6-one (6*).*** Using a procedure analogous to the preparation of **2**, and starting from **23b** and 3-methoxythiophenol, **6** was obtained in 81% as white crystals; mp 176–177 °C. FT-IR (KBr), max: 3187, 1661, 1591, 1571, 1461, 1385, 1235, 765, 684 cm−1. 1H NMR (CDCl3) **: 8.29 (d, *J* = 2.2 Hz, 1H), 8.25 (br s, 1H), 8.05 (d, *J* = 2.2 Hz, 1H), 7.18 (dd, *J* = 8.1, 8.1 Hz, 1H), 6.94 (s, 1H), 6.90–6.71 (m, 3H), 4.14 (q, *J* = 7.3 Hz, 2H), 4.05 (s, 2H), 3.72 (s, 3H), 2.35 (s, 3H), 1.21 (t, *J* = 7.3 Hz, 3H). 13C NMR (CDCl3) **: 168.5, 159.9, 158.2, 152.6, 151.3, 145.0, 142.6, 141.0, 136.2, 129.9, 128.6, 124.0, 122.4, 121.3, 120.2, 115.7, 112.9, 55.2, 42.1, 35.3, 17.8, 13.6 ppm. HRMS (ESI-TOF) calcd. for C22H22N4O2SCl [M+H]+ 441.1147; found: 441.1143.

**2-Chloro-5,11-dihydro-11-ethyl-8-{[(phenyl)thio]methyl}-5-methyl-6*H*-dipyrido[3,2-*b*:2’,3’-*e*][1,4]diazepin-6-one (9).** A solution of **2** (32 mg, 0.08 mmol) in *N*,*N*-dimethylformamide (2 mL) was added with sodium hydride (60% suspension in oil, 5 mg, 0.12 mmol), and the mixture was heated at 50 °C under N2 atmosphere for 30 min. After cooling down, methyl iodide (0.05 mL, 0.85 mmol) was added, and the mixture was stirred at room temperature for 0.5 h. Then water was added, and the mixture was extracted with ethyl acetate. The organic layer was washed with water, dried over Na2SO4, and concentrated under reduced pressure. The residue was purified by silica gel column chromatography (20% EtOAc/hexane) to give **9** (27 mg, 81%). 1H NMR (CDCl3) **: 8.24 (d, *J* = 2.2 Hz, 1H), 8.05 (d, *J* = 2.2 Hz, 1H), 7.42 (d, *J* = 8.1 Hz, 1H), 7.32–7.18 (m, 5H), 7.09 (d, *J* = 8.8 Hz, 1H), 4.15 (q, *J* = 7.3 Hz, 2H), 4.05 (s, 2H), 3.46 (s, 3H), 1.24 (t, *J* = 7.3 Hz, 3H). 13C NMR (CDCl3) **: 167.0, 158.0, 154.2, 150.6, 145.0, 141.4, 135.1, 133.1(2C), 130.4(2C), 130.2, 129.0(2C), 126.9, 120.6, 119.8, 41.5, 37.4, 35.5, 13.5 ppm. HRMS (APCI-TOF) calcd. for C21H20N4OSCl [M+H]+ 411.1041; found: 411.1042.

**2-Chloro-5,11-dihydro-11-ethyl-4-methyl-8-{[(phenyl)thio]methyl}-5-methyl-6*H*-dipyrido[3,2-*b*:2’,3’-*e*][1,4]diazepin-6-one (7).**Using a procedure analogous to the preparation of **9**, and starting from **5**, **7** was obtained in 87% as white crystals. FT-IR (KBr), max: 2970, 1645, 1583, 1452, 1343, 1247, 733, 690 cm−1. 1H NMR (CDCl3) **: 8.21 (d, *J* = 2.2 Hz, 1H), 7.99 (d, *J* = 2.2 Hz, 1H), 7.30–7.21 (m, 5H), 6.96 (s, 1H), 4.14 (q, *J* = 7.3 Hz, 1H), 4.12 (q, *J* = 7.3 Hz, 1H), 4.05 (s, 2H), 3.32 (s, 3H), 2.32 (s, 3H), 1.24 (t, *J* = 7.3 Hz, 3H). 13C NMR (CDCl3) **: 168.1, 158.7, 156.8, 150.0, 146.4, 145.8, 140.8, 135.1, 130.5(2C), 129.0(2C), 128.8, 128.5, 127.0, 122.0, 121.6, 41.2, 38.2, 35.7, 19.0, 13.5 ppm. MS (EI), *m/z* (relative intensity): 425 (M+, 3), 349 (21), 269 (100), 227 (30). HRMS (APCI-TOF) calcd. for C22H22N4OSCl [M+H]+ 425.1197; found: 425.1192.

**2-Chloro-5,11-dihydro-11-ethyl-4-methyl-8-{[(3-methoxyphenyl)thio]­methyl}-5-methyl-6*H*-dipyrido[3,2-*b*:2’,3’-*e*][1,4]diazepin-6-one (8).** Using a procedure analogous to the preparation of **9**, and starting from **6**, **8** was obtained in 83% as white crystals; mp 120–121 °C. FT-IR (KBr), max: 2935, 1642, 1588, 1455, 1385, 1249, 782, 689 cm−1. 1H NMR (CDCl3) **: 8.23 (d, *J* = 2.2 Hz, 1H), 8.01 (d, *J* = 2.2 Hz, 1H), 7.27–6.71 (m, 4H), 4.14 (q, *J* = 7 Hz, 2H), 4.05 (s, 2H), 3.70 (s, 3H), 3.32 (s, 3H), 2.33 (s, 3H), 1.25 (t, *J* = 7 Hz, 3H). 13C NMR (CDCl3) **: 168.0, 159.9, 158.5, 156.6, 149.8, 146.5, 145.8, 141.0, 136.2, 129.9, 128.8, 128.5, 122.5, 122.1, 121.7, 115.7, 113.0, 55.2, 41.3, 38.2, 35.5, 19.0, 13.5 ppm. MS (EI), *m/z* (relative intensity): 454 (M+, 4), 315 (100), 287 (13). HRMS (APCI-TOF) calcd. for C23H24N4O2SCl [M+H]+ 455.1308; found: 455.1316.

**2-Chloro-4-methyl-3-nitropyridine (25).** A stirred mixture of **24** (600 mg, 3.90 mmol) and POCl3 (2 mL, 21.4 mmol) was heated at 150 °C in a sealed vessel for 6 h. After cooling down, the mixture was poured into ice-water and stirred for an additional 1 h. The resultant precipitate was filtered and washed with water. The solid was dissolved in CH2Cl2 and washed with saturated aqueous NaHCO3 and water, then dried over Na2SO4 and concentrated under reduced pressure. The residue was purified by silica gel column chromatography (15% EtOAc/hexane) to yield **25** (570 mg, 85%) as a yellow solid; mp 51–52 °C. FT-IR (KBr), max: 1590, 1526, 1359, 854, 838 cm−1. 1H NMR (CDCl3) **: 8.39 (d, *J* = 5.1 Hz, 1H), 7.25 (d, *J* = 5.1 Hz, 1H), 2.40 (s, 3H). 13C NMR (CDCl3) **: 149.8 (2C), 142.0, 141.8, 125.1 (2C), 17.1 ppm. MS (EI), *m/z* (relative intensity): 173 (M+, 100), 156 (30), 128 (6). HRMS (APCI-TOF) calcd. for C6H6N2O2Cl [M+H]+ 173.0112; found: 173.0113.

**2-(Cyclopropylamino)-4-methyl-3-nitropyridine (26).** A stirred mixture of **25** (550 mg, 3.2 mmol) and cyclopropylamine (0.9 mL, 12.8 mmol) in xylene (1 mL) was heated at 105 °C in a sealed vessel for 4 h. After cooling down, the mixture was poured into water and extracted with CH2Cl2. The organic layer was washed with water, dried over Na2SO4, and concentrated under reduced pressure. The residue was purified by silica gel column chromatography (10% EtOAc/hexane) to yield **26** (610 mg, 99%) as a yellow solid. FT-IR (KBr), max: 3404, 1596, 1558, 1359, 861 cm−1. 1H NMR (CDCl3) **: 8.23 (d, *J* = 5.1 Hz, 1H), 7.51 (br s, 1H), 6.54 (d, *J* = 5.1 Hz, 1H), 3.00–2.88 (m, 1H), 2.53 (s, 3H), 0.95–0.85 (m, 1H), 0.62–0.54 (m, 1H). 13C NMR (CDCl3) **: 153.6, 152.2, 146.0, 131.0, 116.3, 24.4, 21.4, 7.3 (2C) ppm. MS (EI), *m/z* (relative intensity): 194 ((M+H)+, 100), 176 (76), 146 (60), 131 (20).

**3-Amino-2-cyclopropylamino-4-methylpyridine (27).** Using a procedure analogous to the preparation of **14**, and starting from **26**, **27** was obtained in 83% as a white solid; mp 141–143 °C. FT-IR (KBr), max: 3334, 1655, 1609, 1558, 1516, 1424, 1365, 1235, 1019, 805 cm−1. 1H NMR (CDCl3) **: 7.72 (d, *J* = 5.1 Hz, 1H), 6.49 (d, *J* = 5.1 Hz, 1H), 4.63 (br s, 1H), 3.19 (br s, 2H), 2.84–2.77 (m, 1H), 2.15 (s, 3H), 0.84–0.75 (m, 1H), 0.53–0.46 (m, 1H). 13C NMR (CDCl3) **: 150.1, 138.0, 129.6, 127.0, 116.6, 24.5, 16.6, 7.1 (2C) ppm. MS (EI), *m/z* (relative intensity): 164 ((M+H)+, 100), 148 (66), 134 (20), 80 (22). HRMS (APCI-TOF) calcd. for C9H14N3 [M+H]+ 164.1182; found: 164.1182.

**2-Hydroxy-5-nitronicotinic acid (29).** A 69% HNO3 (3 mL, 46.3 mmol) was added to a stirred solution of **28** (3.0 g, 21.6 mmol) in concentrated H2SO4 (24 mL). The reaction mixture was heated to 50 °C and maintained at that temperature for 7 h. After cooling down, the mixture was poured into ice-water and stirred for an additional hour. The resultant pale yellow solid was filtered, washed with cold water, and dried to yield **29** (3.13 g, 79%); mp 241–242 °C. FT-IR (KBr), max: 3027, 2872, 1717, 1624, 1572, 1466, 1356, 1147, 896, 653, 599, 509 cm−1. 1H NMR (acetone-*d*6) **: 9.16 (d, *J* = 2.9 Hz, 1H), 9.00 (d, *J* = 2.9, 1H). 13C NMR (acetone-*d*6) **: 165.7, 163.7, 142.1, 140.2, 133.4, 118.3 ppm. MS (EI), *m/z* (relative intensity): 184 (M+, 50), 140 (100), 127 (31), 108 (24), 94 (75).

**2-Chloro-5-nitronicotinic acid (30).** A mixture of **29** (2.0 g, 10.87 mmol) and POCl3 (6 mL, 64.36 mmol) was heated at reflux for 4 h. After cooling down to ambient temperature, the mixture was slowly dropped into water (200 mL), maintaining the temperature below 40 °C. Ice was added as necessary to cool the solution. Afterwards, the solution was stirred at room temperature overnight. The mixture was then extracted with diethyl ether, and the organic layer was washed with water, dried over Na2SO4, and concentrated under reduced pressure to yield **30** (1.72 g, 78%) as a yellow solid; mp 140–141 °C. FT-IR (KBr), max, cm−1: 2909, 1718, 1609, 1575, 1415, 1358, 1273, 1240, 1135, 732. 1H NMR (DMSO-*d*6) **: 9.32 (d, *J* = 2.9 Hz, 1H), 8.85 (d, *J* = 2.9, 1H). 13C NMR (DMSO-*d*6) **: 163.9, 152.8, 146.5, 143.3, 134.9, 128.3 ppm. MS (EI), m/z(relative intensity): 202 (M+, 100), 174 (53), 156 (74), 100 (65), 76 (67).

**N-(2-cyclopropylamino-4-methyl-3-pyridinyl)-2-chloro-5-nitro-3-pyridinecarboxamide (31).** A stirred solution of **30** (250 mg, 1.23 mmol) in benzene (5 mL) was treated with oxalyl chloride (0.3 mL, 3.9 mmol) followed by a catalytic amount of *N*,*N*-dimethylformamide (2 drops), and the mixture was stirred at room temperature for 1 h. Then the solvent was removed under reduced pressure to produce the acid chloride as a white solid. The acid chloride was then dissolved in tetrahydrofuran (2 mL) and was added dropwise to a cooled stirred solution of **27** (116 mg, 0.71 mmol) in tetrahydrofuran (3 mL) containing *N*-ethyldiisopropylamine (0.37 mL, 2.13 mmol). The reaction mixture was stirred at room temperature for 5 h. Afterwards, the mixture was added water and extracted with CH2Cl2. The organic layer was washed with saturated aqueous NaHCO3 and water. It was then dried over Na2SO4 and concentrated under reduced pressure. The residue was purified by silica gel column chromatography (30% EtOAc/hexane) to produce **31** (105 mg, 53%) as a yellow solid; mp 172–173 °C (dec.). FT-IR (KBr), max: 3230, 1650, 1602, 1568, 1521, 1352, 746 cm−1. 1H NMR (acetone-*d*6) **: 9.30 (d, *J* = 2.9 Hz, 1H), 9.22 (br s, 1H), 8.95 (d, *J* = 2.9, 1H), 7.96 (d, *J* = 5.1 Hz, 1H), 6.58 (d, *J* = 4.4 Hz, 1H), 5.80 (br s, 1H), 2.79.–2.71 (m, 1H), 2.29 (s, 3H), 0.73–0.63 (m, 2H), 0.42–0.35 (m, 2H). 13C NMR (acetone-*d*6) **: 163.2, 157.1, 153.4, 147.5, 146.5, 145.6, 144.7, 134.4, 134.2, 116.9, 115.9, 25.2, 18.2, 7.5 (2C) ppm. MS (EI), *m/z* (relative intensity): 348 ((M+H)+, 56), 332 (15), 314 (100), 233 (65), 162 (75). HRMS (APCI-TOF) calcd. for C15H15N5O3Cl [M+H]+ 348.0858; found: 348.0863.

**4-Methyl-8-nitro-5,11-dihydro-11-cyclopropyl-6*H*-dipyrido[3,2-*b*:2’,3’-*e*][1,4]diazepin-6-one (32).** A suspension of **31** (378 mg, 1.09 mmol) in hexamethyldisilazane (36 mL) was heated at 110 °C for 24 h. After cooling down to room temperature, the mixture was added with water and extracted with CH2Cl2. The organic layer was washed with water, dried over Na2SO4, and concentrated under reduced pressure. Recrystallization from acetone produced yellow crystals of **32** (305 mg, 90%); mp 266–268°C (dec.). FT-IR (KBr), max: 3197, 1659, 1592, 1519, 1460, 1336 cm−1. 1H NMR (CDCl3) **: 9.23 (d, *J* = 2.2 Hz, 1H), 8.89 (d, *J* = 2.2 Hz, 1H), 8.20 (d, *J* = 5.1 Hz, 1H), 8.10 (br s, 1H), 7.04 (d, *J* = 5.1 Hz, 1H), 3.80–3.70 (m, 1H), 2.42 (s, 3H), 1.10–1.00 (m, 1H), 0.60–0.50 (m, 1H). 13C NMR (CDCl3) **: 166.4, 163.9, 151.8, 147.5, 144.9, 140.1, 139.6, 136.5, 124.4, 123.0, 118.8, 30.8, 17.6, 9.3 (2C) ppm. HRMS (ESI-TOF) calcd. for C15H14N5O3 [M+H]+ 312.1091; found: 312.1087.

**8-Amino-4-methyl-5,11-dihydro-11-cyclopropyl-6H-dipyrido[3,2-*b*:2’,3’-*e*][1,4]diazepin-6-one hydrochloride salt (10).** A solution of SnCl2.2H2O (190 mg, 0.84 mmol) in concentrated HCl (0.7 mL) was added dropwise to a stirred, cooled solution of **32** (80 mg, 0.25 mmol) in acetic acid (2.8 mL). The yellow precipitate was formed, and the mixture was stirred for 1 h at room temperature. The yellow solid was collected by filtration, washed with tetrahydrofuran, and dried to produce **10** (60 mg, 73%). FT-IR (KBr), max: 3519, 2587, 1668, 1620, 1539, 1468, 1254 cm−1. 1H NMR (DMSO-*d*6) **: 10.12 (s, 1H), 8.47 (d, *J* = 2.2 Hz, 1H), 8.12 (d, *J* = 5.1 Hz, 1H), 7.99 (d, *J* = 2.2 Hz, 1H), 7.18 (d, *J* = 5.1 Hz, 1H), 5.63 (br s), 3.63 (m, 1H), 2.37 (s, 3H), 0.92–0.89 (m, 1H), 0.50–0.30 (m, 1H). 13C NMR (DMSO-*d*6) **: 165.6, 156.6, 152.6, 143.6, 142.6, 142.4, 133.4, 128.0, 125.2, 122.7, 121.1, 29.5, 17.7, 8.8, 8.6 ppm. HRMS (ESI-TOF) calcd. for C15H16N5O [M+H]+ 282.1349; found: 282.1354.

**8-Amino-4-methyl-5,11-dihydro-11-cyclopropyl-6H-dipyrido[3,2-*b*:2’,3’-*e*][1,4]diazepin-6-one (11).** A solution of **10** in water was added with 50% aqueous NaOH to pH 12 and was stirred for 1 h. Then the mixture was extracted with CH2Cl2 for several times. The combined organic layers were washed with water, dried over Na2SO4, and concentrated under reduced pressure to yield **11** (90%); mp 293–294 °C (dec.). FT-IR (KBr), max: 3362, 3317, 1662, 1640, 1602, 1472, 1237 cm−1. 1H NMR (DMSO-*d*6) **: 9.69 (s, 1H), 8.01 (d, *J* = 4.4 Hz, 1H), 7.84 (d, *J* = 2.2 Hz, 1H), 7.20 (d, *J* = 2.9 Hz, 1H), 6.98 (d, *J* = 5.1 Hz, 1H), 5.25 (s, 2H), 3.60–3.40 (m, 1H), 2.28 (s, 3H), 0.80–0.60 (m, 1H), 0.30–0.10 (m, 1H). 13C NMR (DMSO-*d*6) **: 167.4, 155.3, 149.9, 143.2, 141.6, 140.1, 137.2, 124.8, 123.1, 121.5, 121.0, 28.8, 17.5, 8.5, 8.4 ppm. HRMS (APCI-TOF) calcd. for C15H16N5O [M+H]+ 282.1360; found: 282.1352.

Biological Testing

**Reverse Transcription Reaction.**This method was adapted from Lerma et al. [1]. HIV-1SUM9 virus was used as a wild-type HIV-1 reverse transcriptase, and K103Nand Y181C were used as the mutant HIV-1 RT enzymes. The exogenous RNA template used in the experiment was derived from the Encephalomyocarditis virus (EMCV) genome. The reaction mixture for reverse transcription is under the following conditions: 10 L 5X RT buffer (250 mM Tris-HCl, pH 8.3, 250 mM KCl, 50 mM MgCl2), 5 L of 10 mM EGTA, 1 L of 100 mM DTT, 6 L of 2%NP40, 2 L of 10 M dNTP, 4 M EMCV R2 primer, 0.25 L 40,000 U/mL RNasin, 0.5 L of 20 ng/L EMCV RNA template, and 5.3 L of diethyl pyrocarbonate-water. Then 1 L of wild-type or mutant type HIV-1 virus at a concentration of 107 nUnits/L or 1 L of DMSO was added to a 19 L reaction mixture. The mixture was then incubated at 42 °C for 1 h. In case of inhibition experiments, 1 L of inhibitors in DMSO at different concentrations was added instead of DMSO. The reactions were stopped by heat at 95 °C for 5 min. Then the EMCV DNA products from these reactions were used as templates for real-time polymerase chain reaction (PCR). The concentrations of 108–103 nU/L of AMV reverse transcriptase were used to create the EMCV cDNA product standard curve.

**Real-time Polymerase Chain Reaction (PCR).** Real-time PCR assay was detected using a Rotor-Gene 3000 (Corbett Robotics, Australia). The PCR cocktail was prepared by adding 2 L of 10X PCR buffer, 0.5 L of 10 M EMCV forward and reverse primers, 0.5 L of hot-start Taq polymerase (Qiagen), 0.25 L of 100 M 6-carboxylfluorescein (FAM probe), and 14.05 L of water. Afterwards, 1 L of the production of reverse transcription reaction was added to each tube containing 19 L of the PCR mastermix. The conditions for PCR are held at 95 °C for 15 min, then 40 cycles of 95 °C for 20 s, 55 °C for 30 s, and 72 °C for 30 s. Fluorescence data were acquired at the end of each annealing step.

**Analysis of Percent Inhibition of Reverse Transcriptase and IC50.**Percent inhibition of reverse transcriptase was calculated from the difference of the reverse transcriptase activity of HIV-1 (wild-type or mutants) without inhibitor and its activity with inhibitor, divided by its activity without inhibitor, then multiplied by 100. The IC50 was then analyzed as described by Ferreira et al. [2]. Nonlinear regression analysis was used for fitting data to a sigmoidal concentration-response relationship Y=1/(1+10((LogIC50-X)Slope), where the slope is the Hill slope parameter, IC50 is the concentration of inhibitors that is required for 50% inhibition of reverse transcriptase, X is the compound concentration (M), and Y is 0.01 of percent inhibition (GraphPad Prism; GraphPad Software, San Diego, CA).

**References**

1. Lerma, J. G. G.; Heneine, W. Ultrasensitive detection of reverse transcriptase activity by the Amp-RT assay: Applications to the measurement of virus loads and phenotypic drug resistance. In *Antiviral Methods and Protocols;* Kinchington, D.; Schinazi, R. F., Eds.; Humana Press: Totowa, New Jersey, 2000; pp. 291–300.

2. Ferreira, S.; Crumb, W.J. Jr.; Carlton, C. G.; Clarkson, C. W. *J. Pharmacol. Exp. Ther.* **2001**, *299*(1), 220–226.
